# Supplementary material for: Bead based facile assay for sensitive quantification of native state green fluorescent protein
Source: Royal Society of Chemistry journal article supplement (doi:10.1039/c9ra09599c), 2020-01-01
Supplement: c9ra09599c1.pdf [file c9ra09599c1.pdf]

## Supporting Information

### **Bead Based Facile Assay for Sensitive Quantification of Native State Green Fluorescent Protein**

Jung Min Kim<sup>a</sup>, Baik Lin Seong<sup>b\*</sup> and Dong-Kwon Lim<sup>a\*</sup>

<sup>a</sup>KU-KIST Graduate School of Converging Science and Technology, Korea University, 145 Anam-ro, Seongbuk-gu, Seoul, 02841, Republic of Korea.

<sup>b</sup>Department of Biotechnology, College of Life Science and Biotechnology, Yonsei University, 50, Yonsei-ro, Seodaemun-gu, Seoul 120-749, Republic of Korea.

\*Correspondence to Prof. Dong-kwon Lim, [dklim@korea.ac.kr](mailto:dklim@korea.ac.kr).

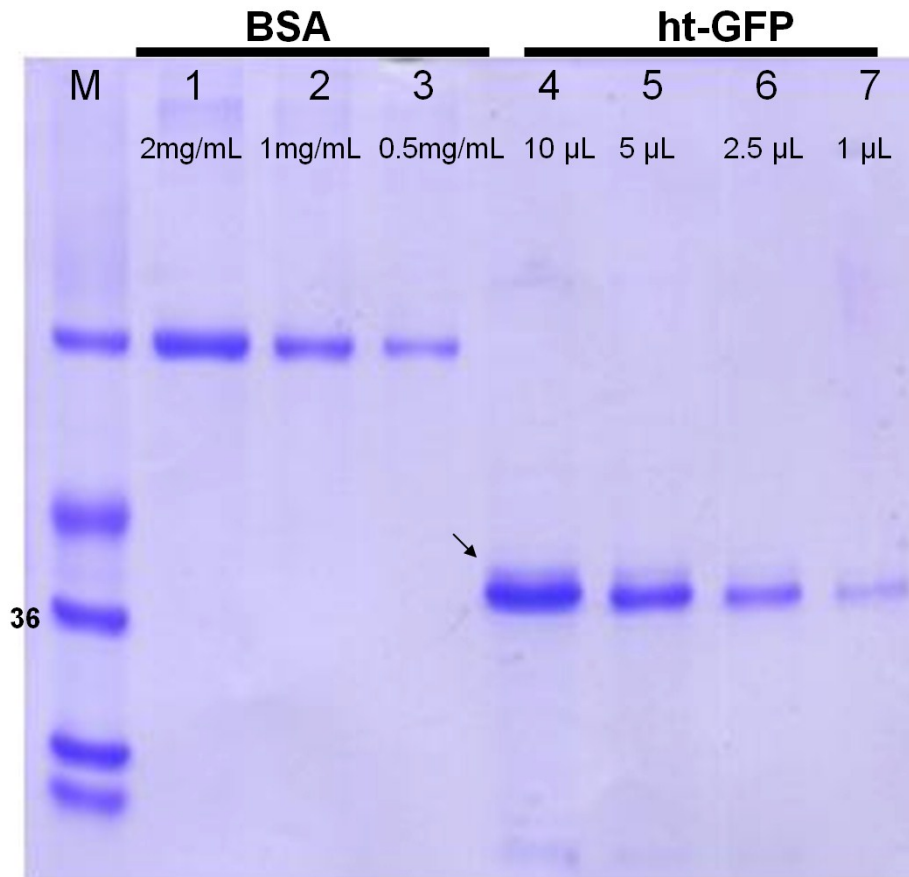

**Fig. S1. The results of gel electrophoresis for BSA and serially diluted purified ht-GFPs.** M represents the molecular weight marker. Lanes 1, 2, and 3 represent BSA at various concentration (2, 1, and 0.5 mg/mL), respectively. Lanes 4, 5, 6 and 7 represent purified ht-GFP (10, 5, 2.5, and 1 μL), respectively.

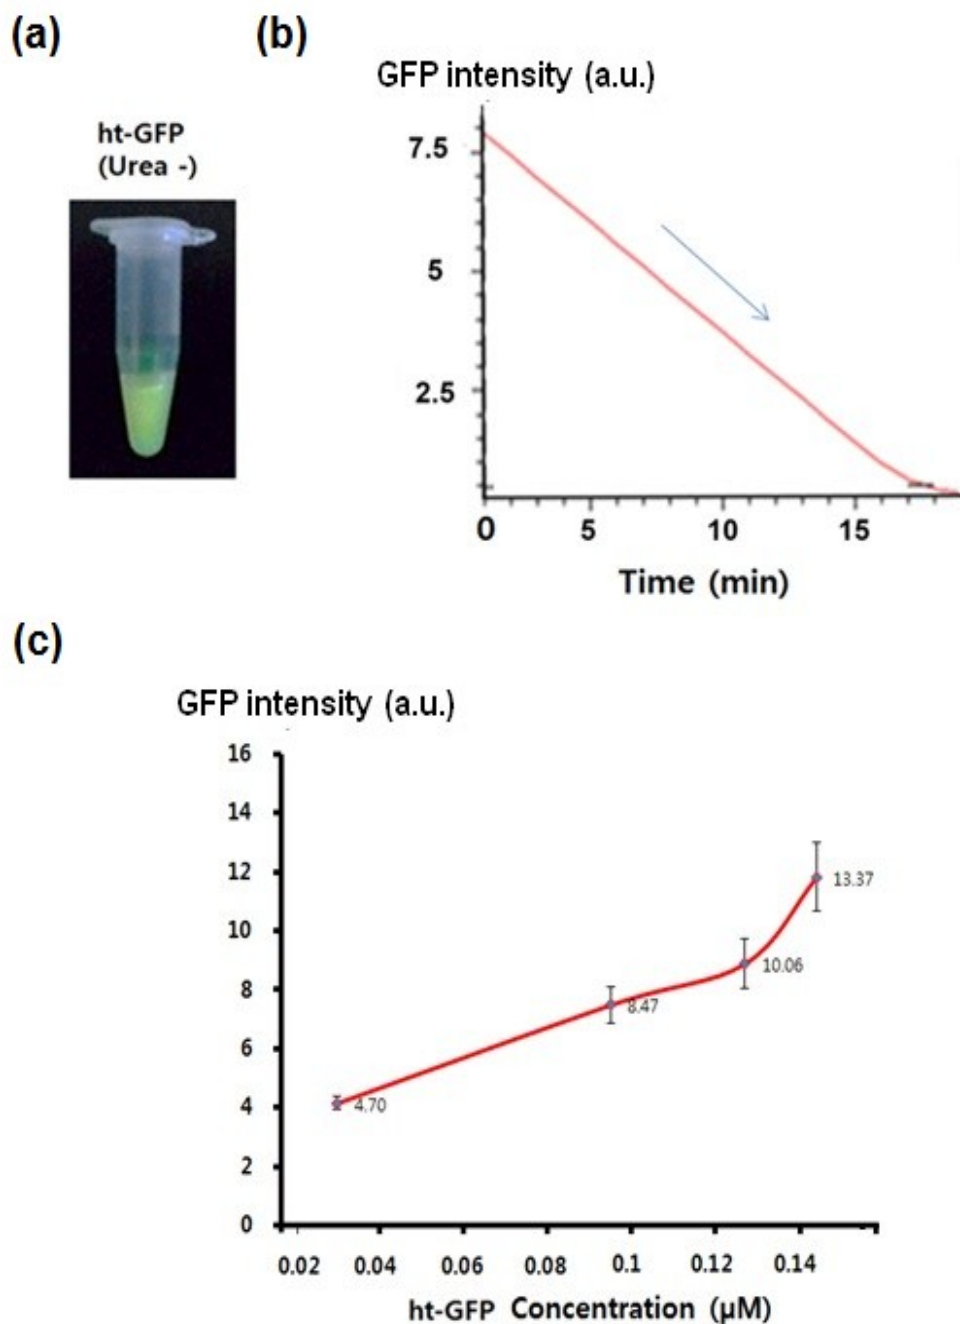

**Fig. S2. The changes in the fluorescent intensity of ht-GFPs with time after urea treatment and the concentration dependent fluorescence intensity.** (a) The photo of ht-GFP (2 mg/mL) before urea treatment, (b) the changes of fluorescence intensity with time /min after urea treatment, (c) the ht-GFP concentration (0.02 – 0.14  $\mu\text{M}$ ) dependent fluorescence intensity. (Ex; 471nm, Em; 512nm).

**Table S1. Fluorescent intensity of agarose bead with varying amount of ht-GFPs.**

| ht-GFP | Fluorescence intensity (a. u.)* |
|--------|---------------------------------|
| 2.5 ng | 20                              |
| 500 pg | < 20                            |
| 200 pg | > 1.5                           |
| 50 pg  | 1.5                             |
| 0      | 0                               |

\* Fluorescence intensity was a mean value measured from 50 individual bead particles.

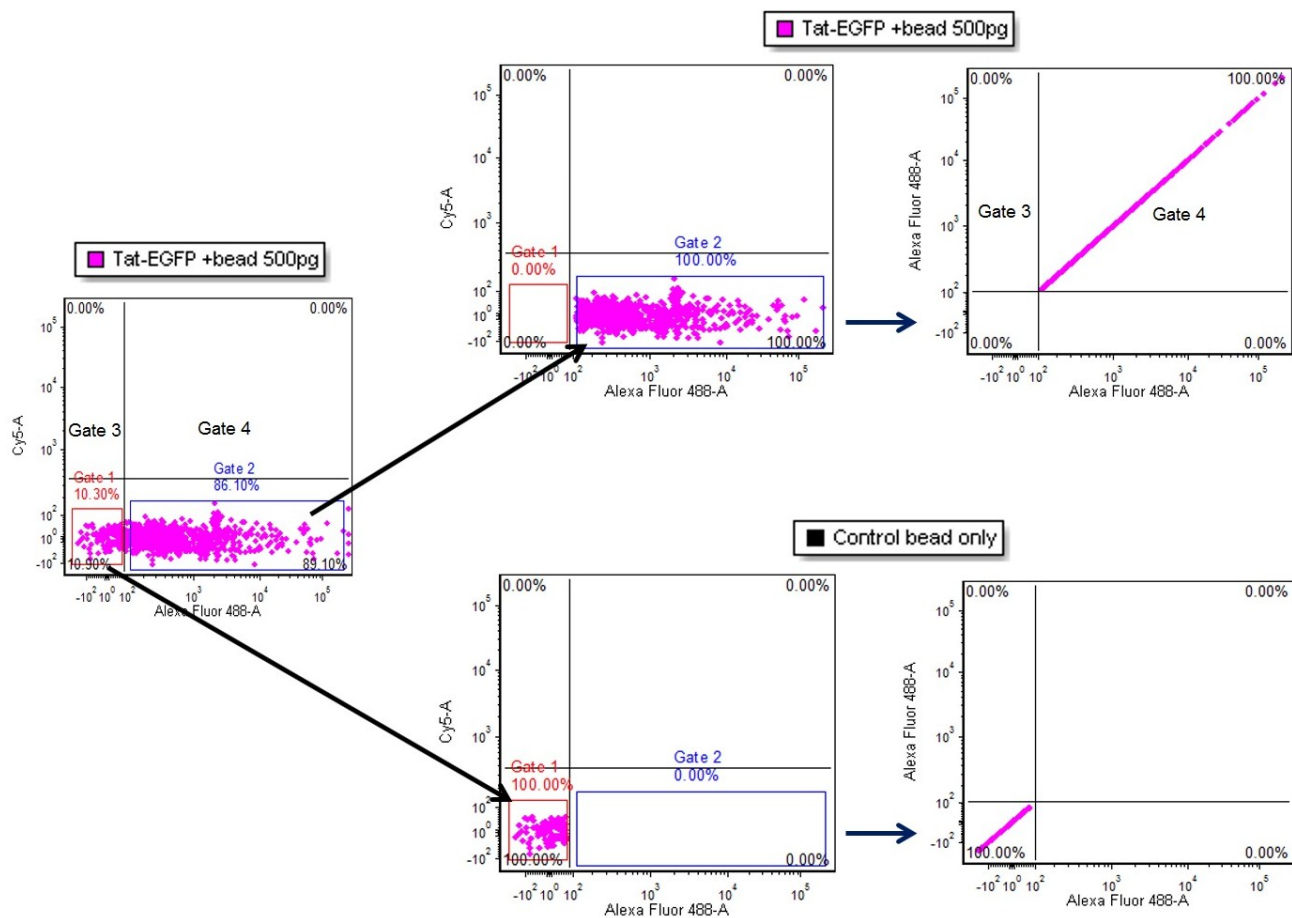

**Fig. S3. Quadrant analysis of magnetic bead with ht-GFPs (0.5 ng) or without ht-GFPs.** The beads incubated with ht-GFPs (0.5 ng) were identified by Alexa Fluor 488 parameters from subsequent Gate 2 analysis. The NTA beads alone were analyzed as negative controls. One thousand events were recorded for Alexa Fluor 488 with a 525/50 BP filter and a series of hierarchical gates to isolate single beads (Negative; Gate 1, Single positive; Gate 2 and Gate 3, Double positive; Gate 4).

**Table S2. Flow cytometry results of magnetic bead binding with ht-GFPs.**

| ht-GFP            | Fluorescence intensity (percent (=%))* |
|-------------------|----------------------------------------|
| 20 $\mu\text{g}$  | 96.1                                   |
| 1 $\mu\text{g}$   | > 92                                   |
| 0.5 $\mu\text{g}$ | 92                                     |
| 0 $\mu\text{g}$   | 0                                      |

\* Fluorescence intensity was a mean value measured from 10000 individual bead particles by Flow cytometry.

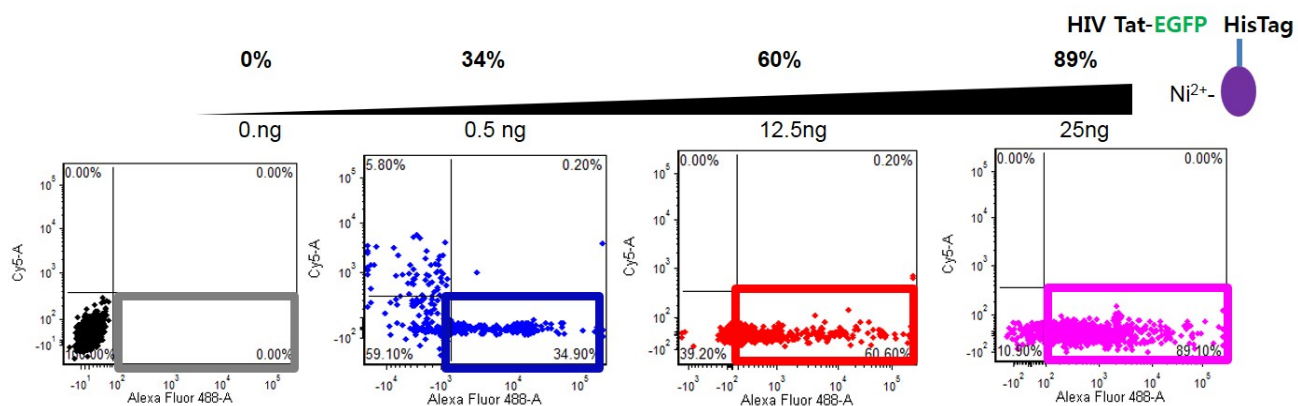

**Fig. S4. The flow cytometry quadrant region analysis for the magnetic bead incubated with varying amount of ht-GFPs (0.5 ng ~ 2.0  $\mu$ g). One thousand particles were recorded from two different channels (Cy5 and Alexa 488).**

## References

## References

1. Crowe, J.; Dobeli, H.; Gentz, R.; Hochuli, E.; Stuber, D.; Henco, K., 6xHis-Ni-NTA chromatography as a superior technique in recombinant protein expression/purification. *Methods Mol. Biol.* **1994**, *31*, 371-87.
2. Wu, J.; Wei, X.; Gan, J.; Huang, L.; Shen, T.; Lou, J.; Liu, B.; Zhang, J. X.; Qian, K., Multifunctional Magnetic Particles for Combined Circulating Tumor Cells Isolation and Cellular Metabolism Detection. *Adv. Funct. Mater.* **2016**, *26* (22), 4016-4025.
3. Dezfouli, M.; Vickovic, S.; Iglesias, M. J.; Nilsson, P.; Schwenk, J. M.; Ahmadian, A., Magnetic bead assisted labeling of antibodies at nanogram scale. *Proteomics* **2014**, *14* (1), 14-8.
4. Adan, A.; Alizada, G.; Kiraz, Y.; Baran, Y.; Nalbant, A., Flow cytometry: basic principles and applications. *Crit. Rev. Biotechnol.* **2017**, *37* (2), 163-176.
5. Waldo, G. S.; Standish, B. M.; Berendzen, J.; Terwilliger, T. C., Rapid protein-folding assay using green fluorescent protein. *Nat. Biotechnol.* **1999**, *17* (7), 691-5.
